# Supplementary figures and images for: The Plastome Sequences of Triticum sphaerococcum (ABD) and Triticum turgidum subsp. durum (AB) Exhibit Evolutionary Changes, Structural Characterization, Comparative Analysis, Phylogenomics and Time Divergence
Source: MDPI journal article supplement (doi:10.3390/ijms23052783), 2022-03-03

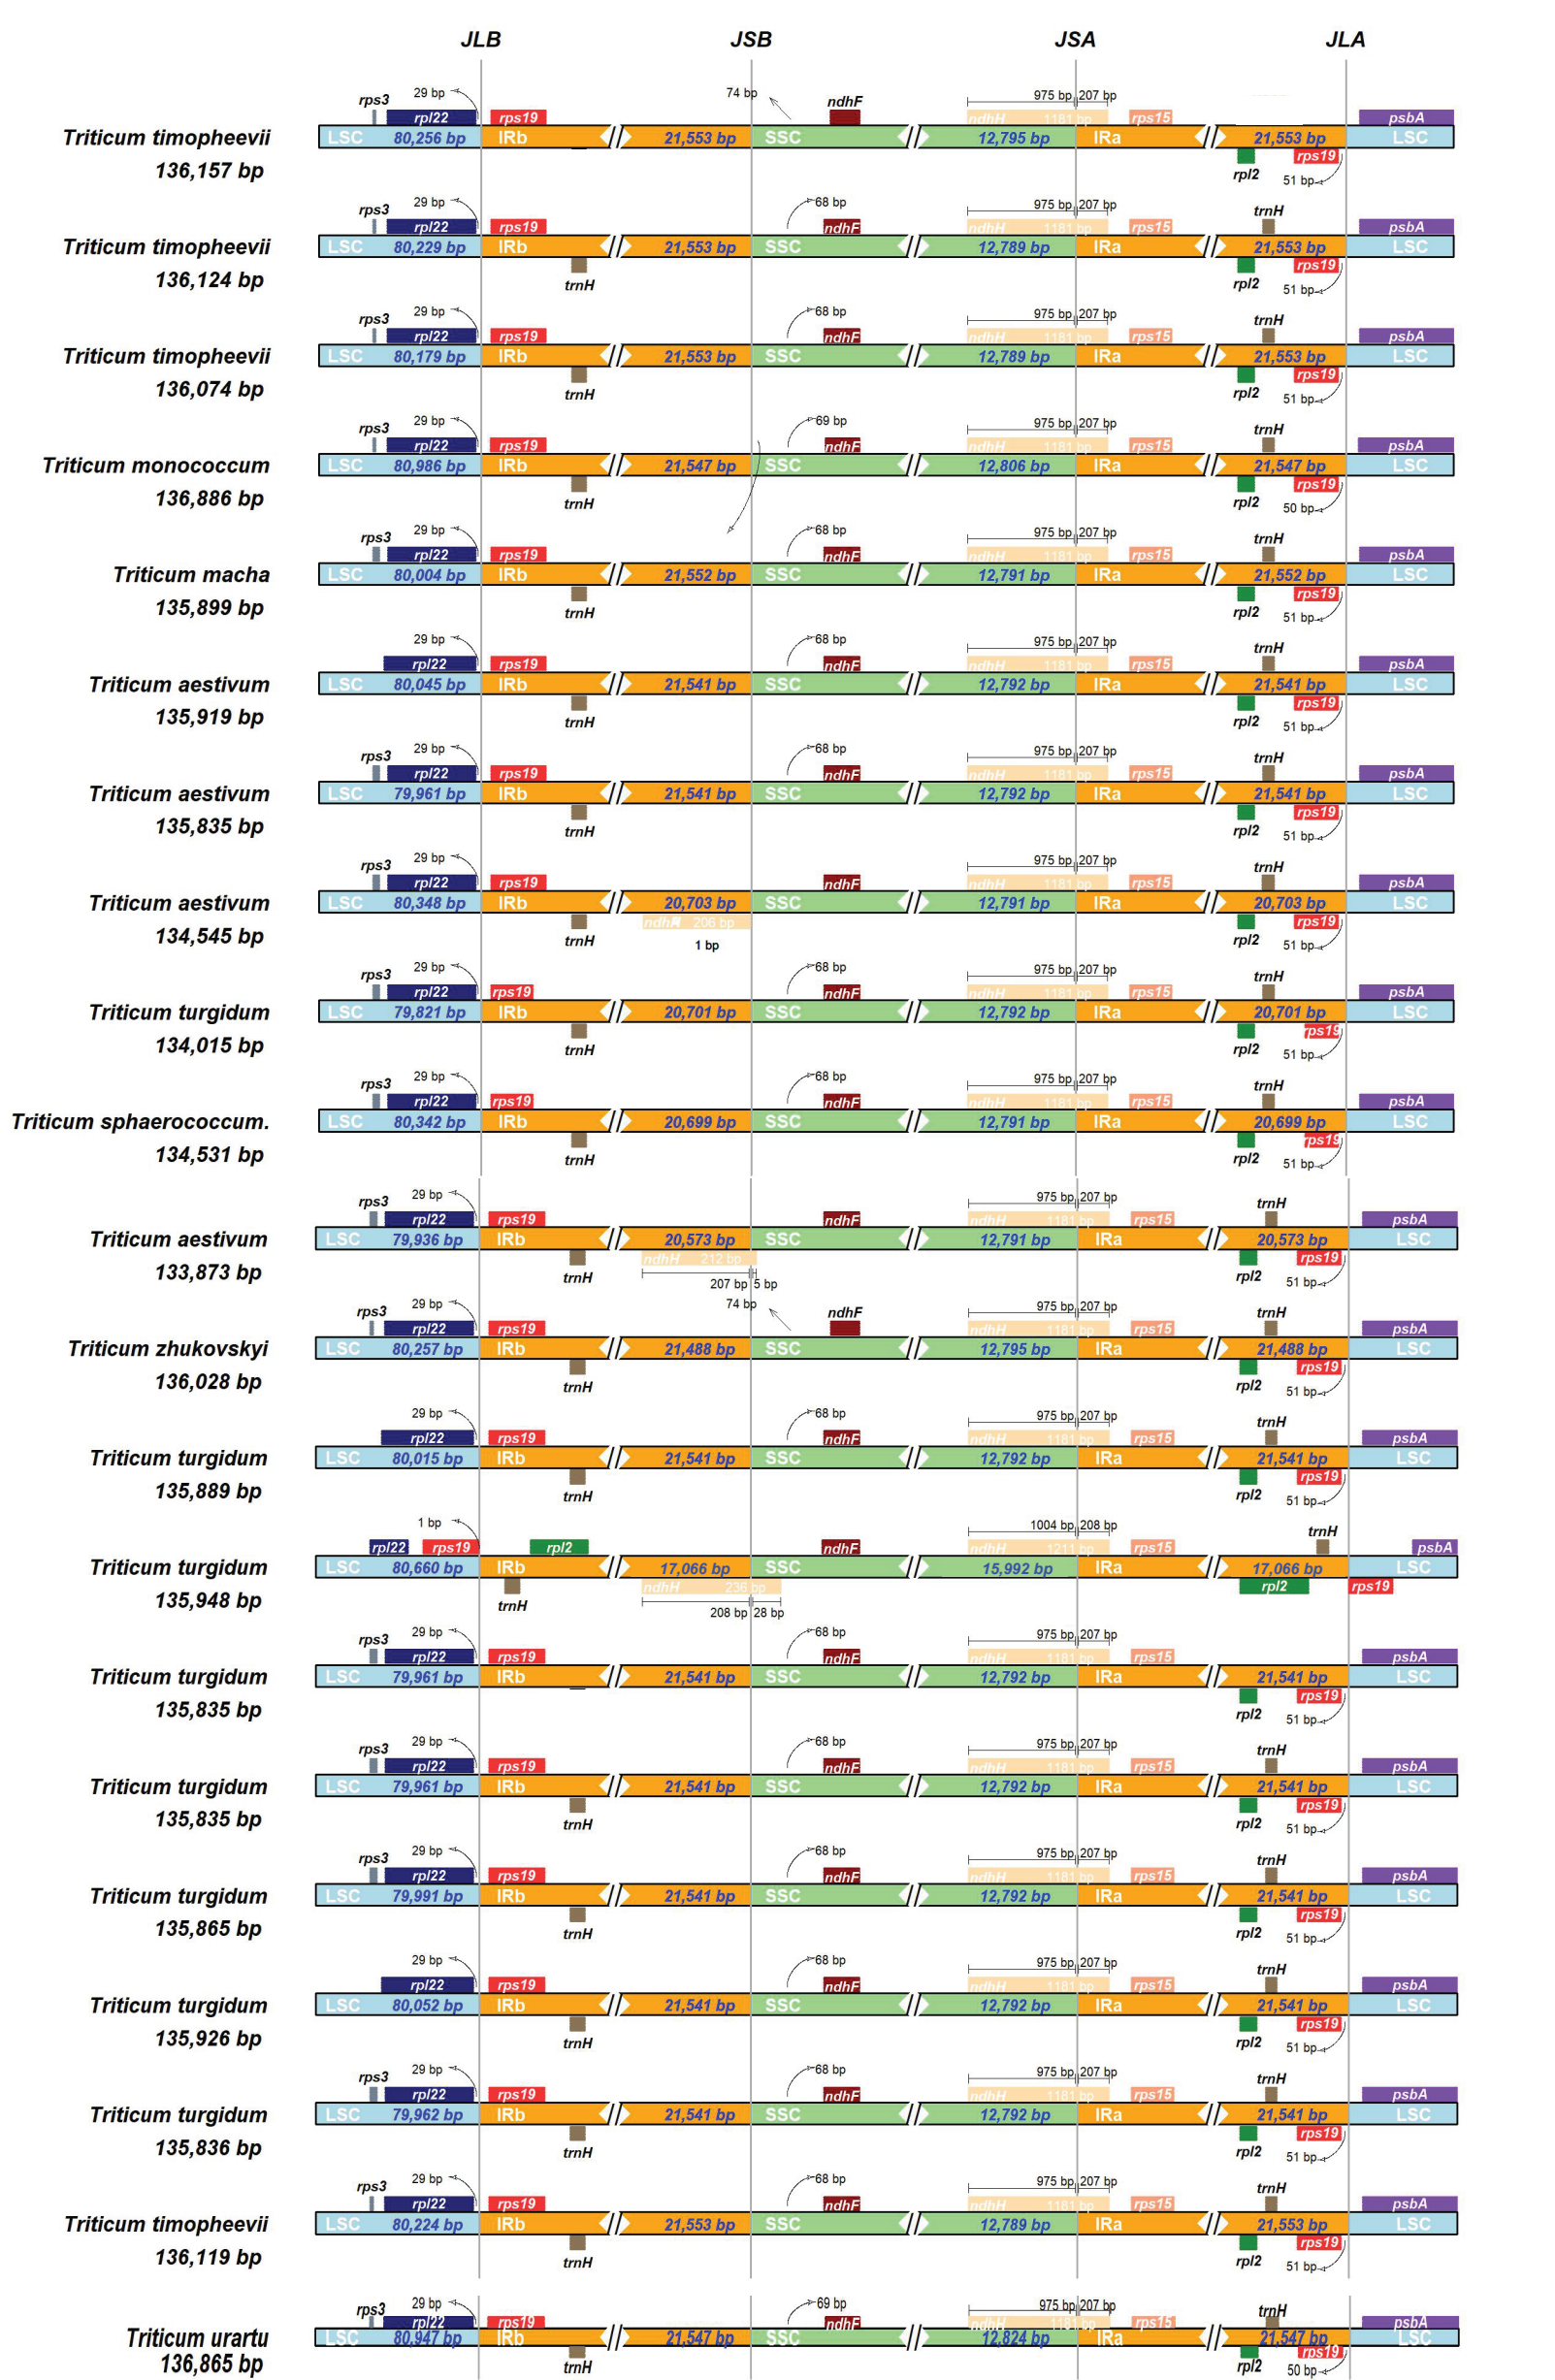

Supplement: s1 [file s1]

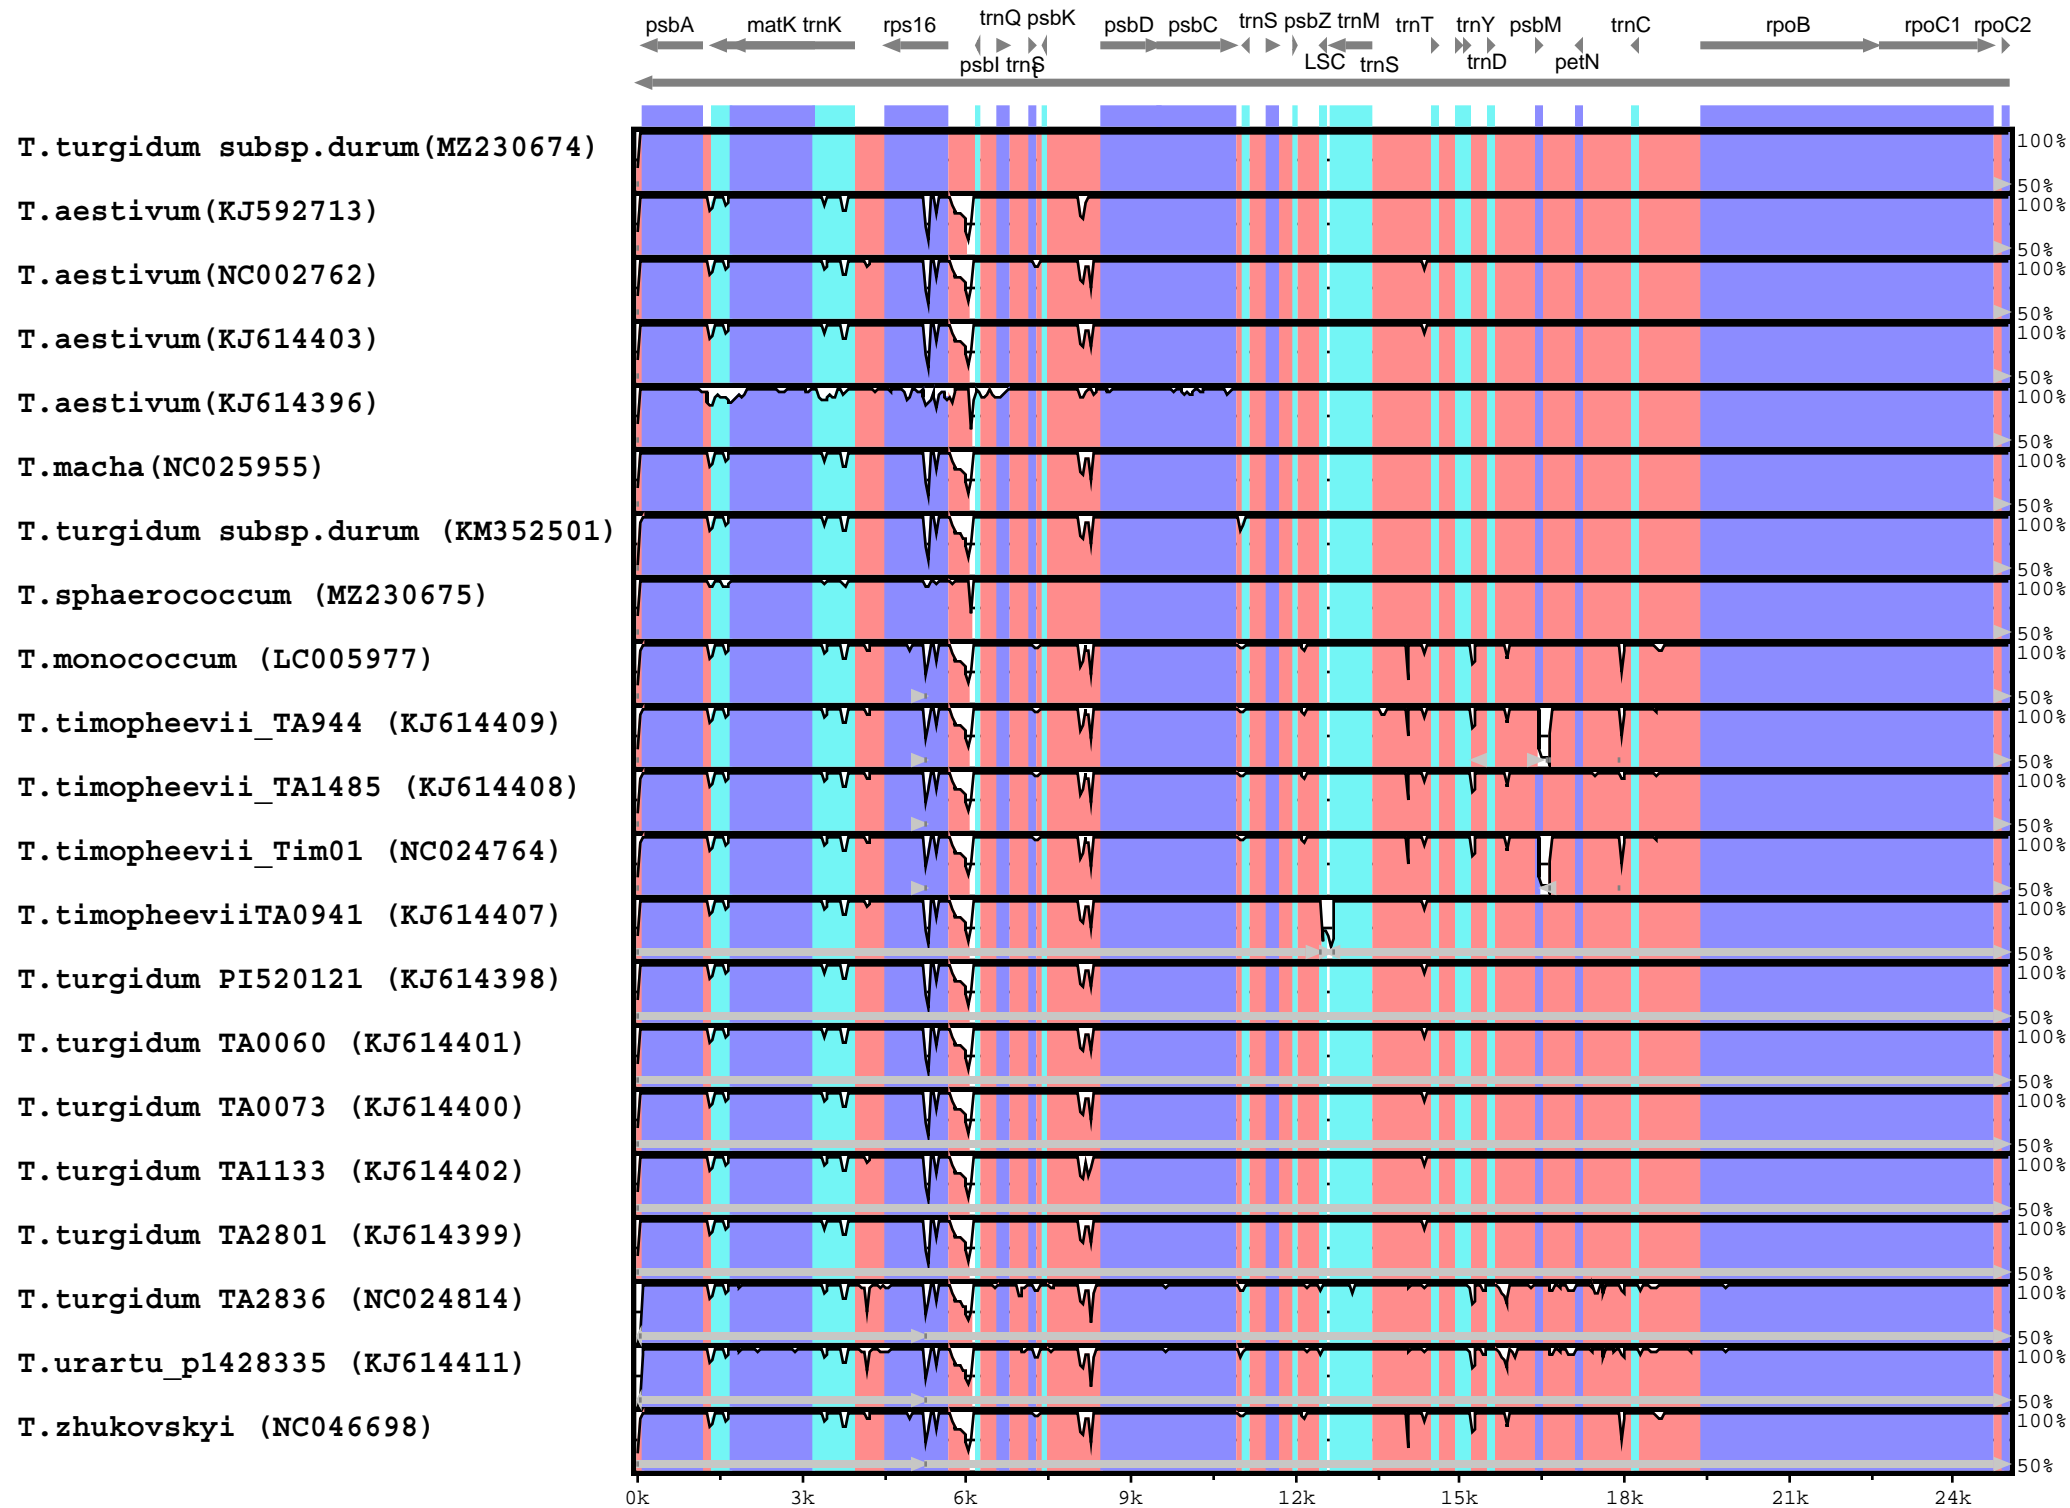

→ contig  
→ gene  
■ exon  
■ UTR  
■ CNS  
■ mRNA

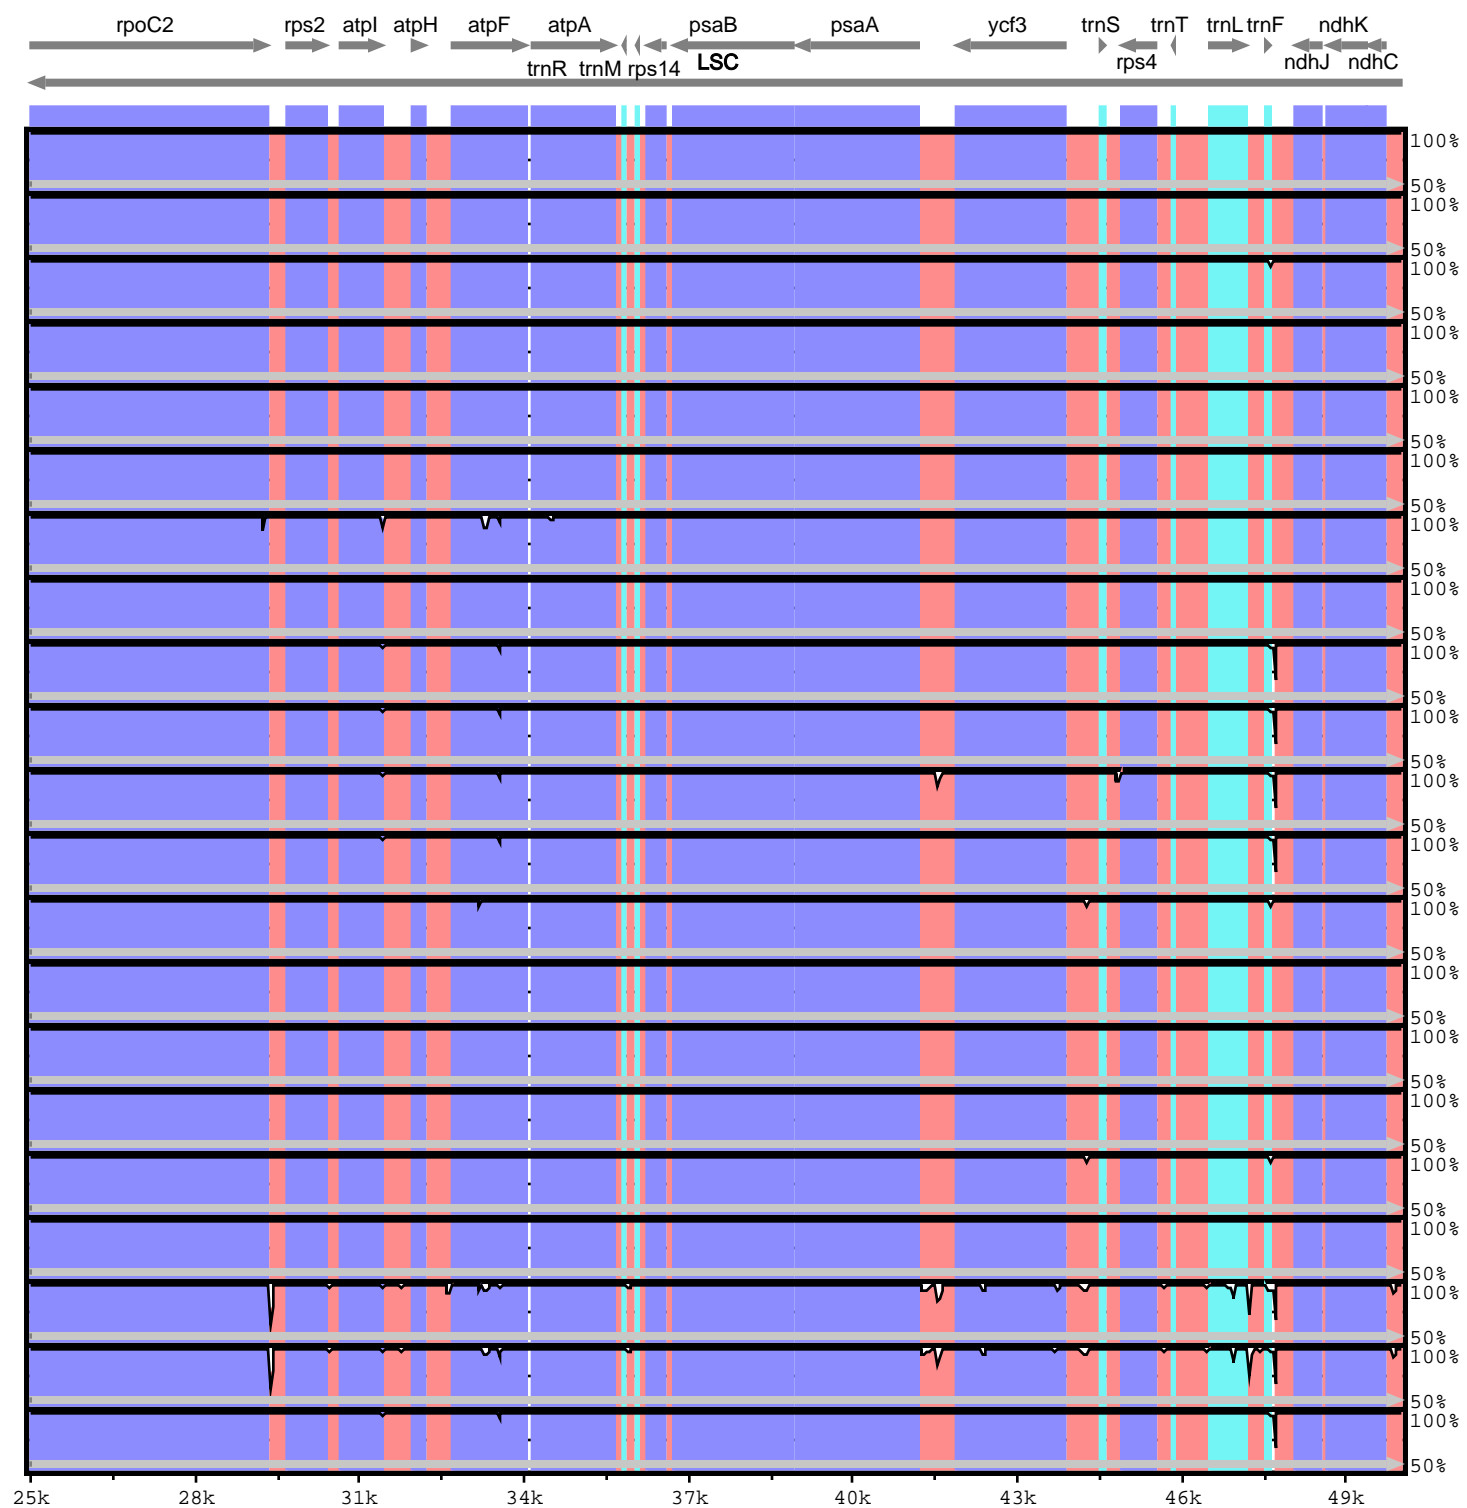

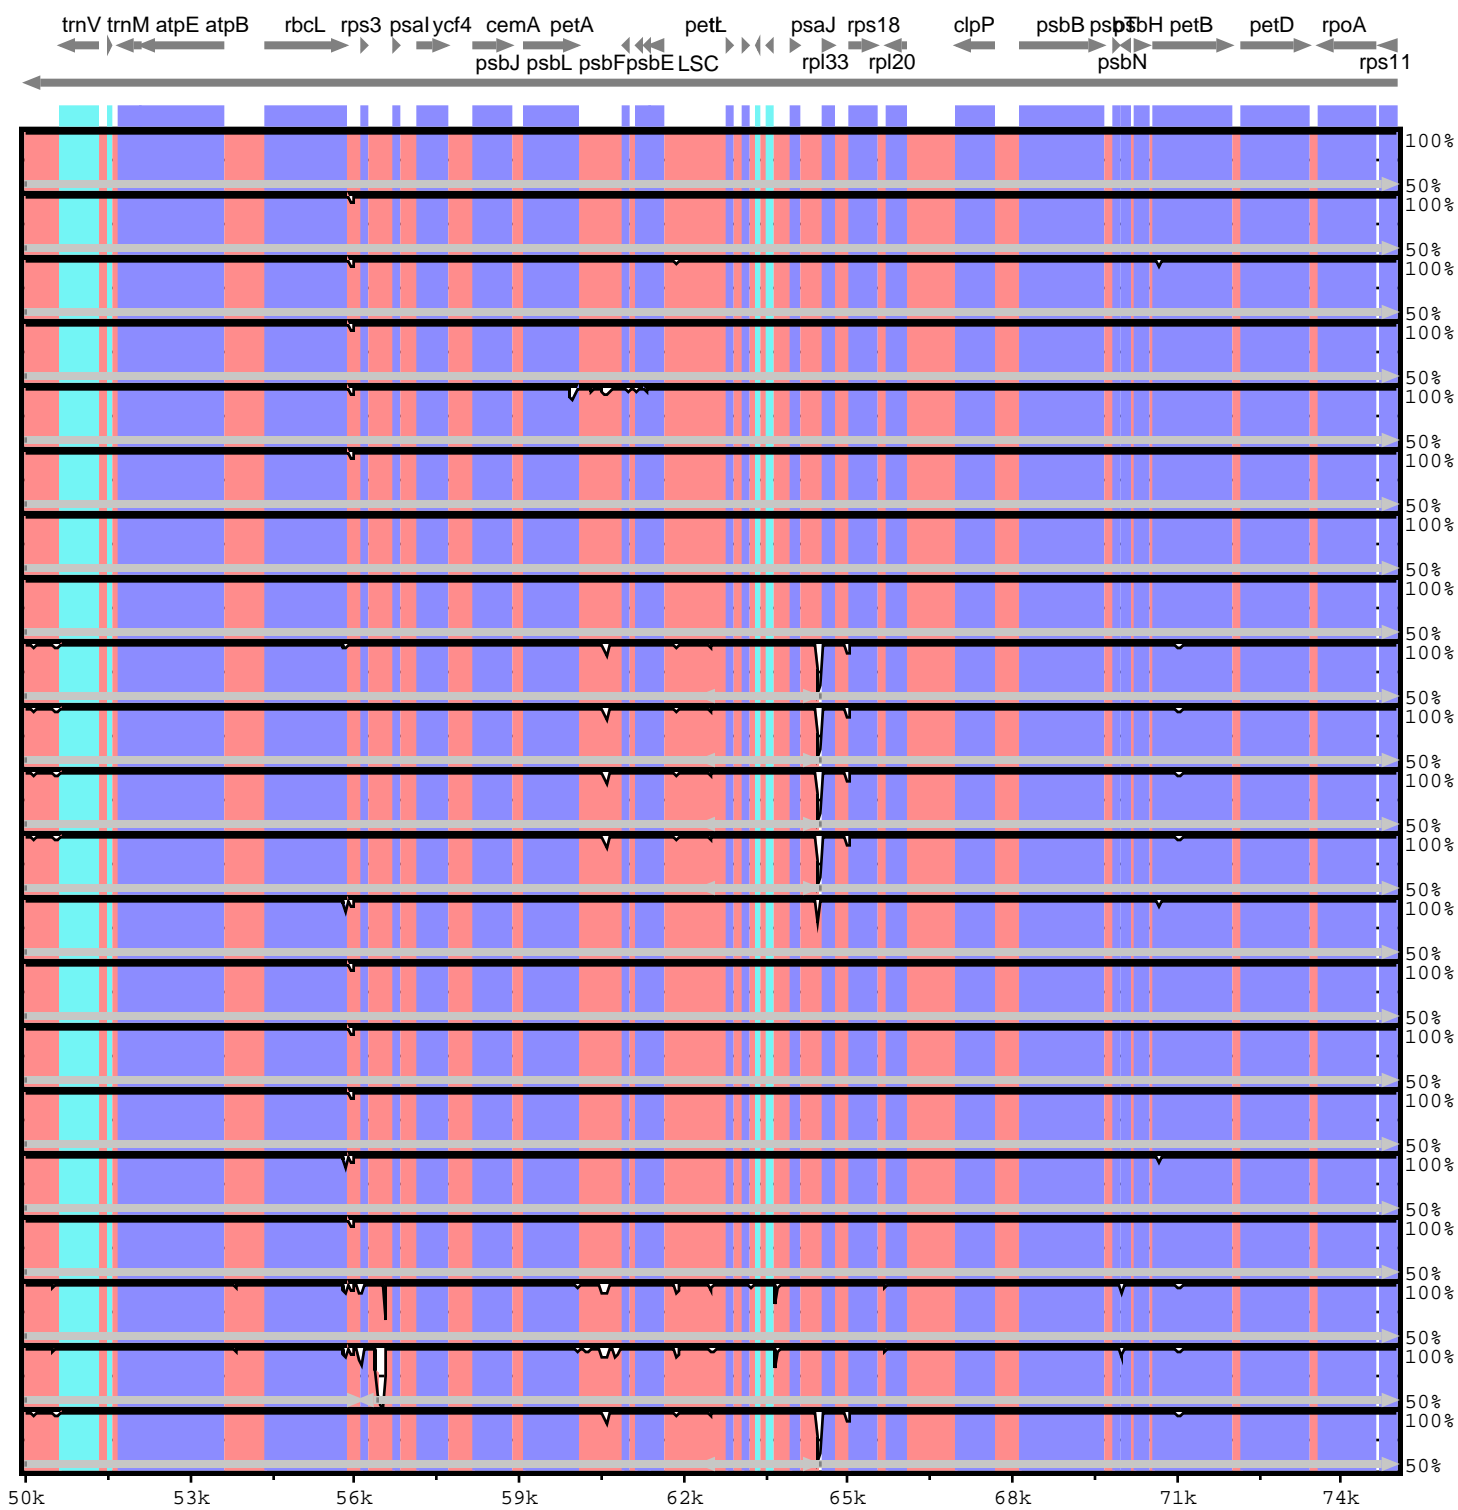

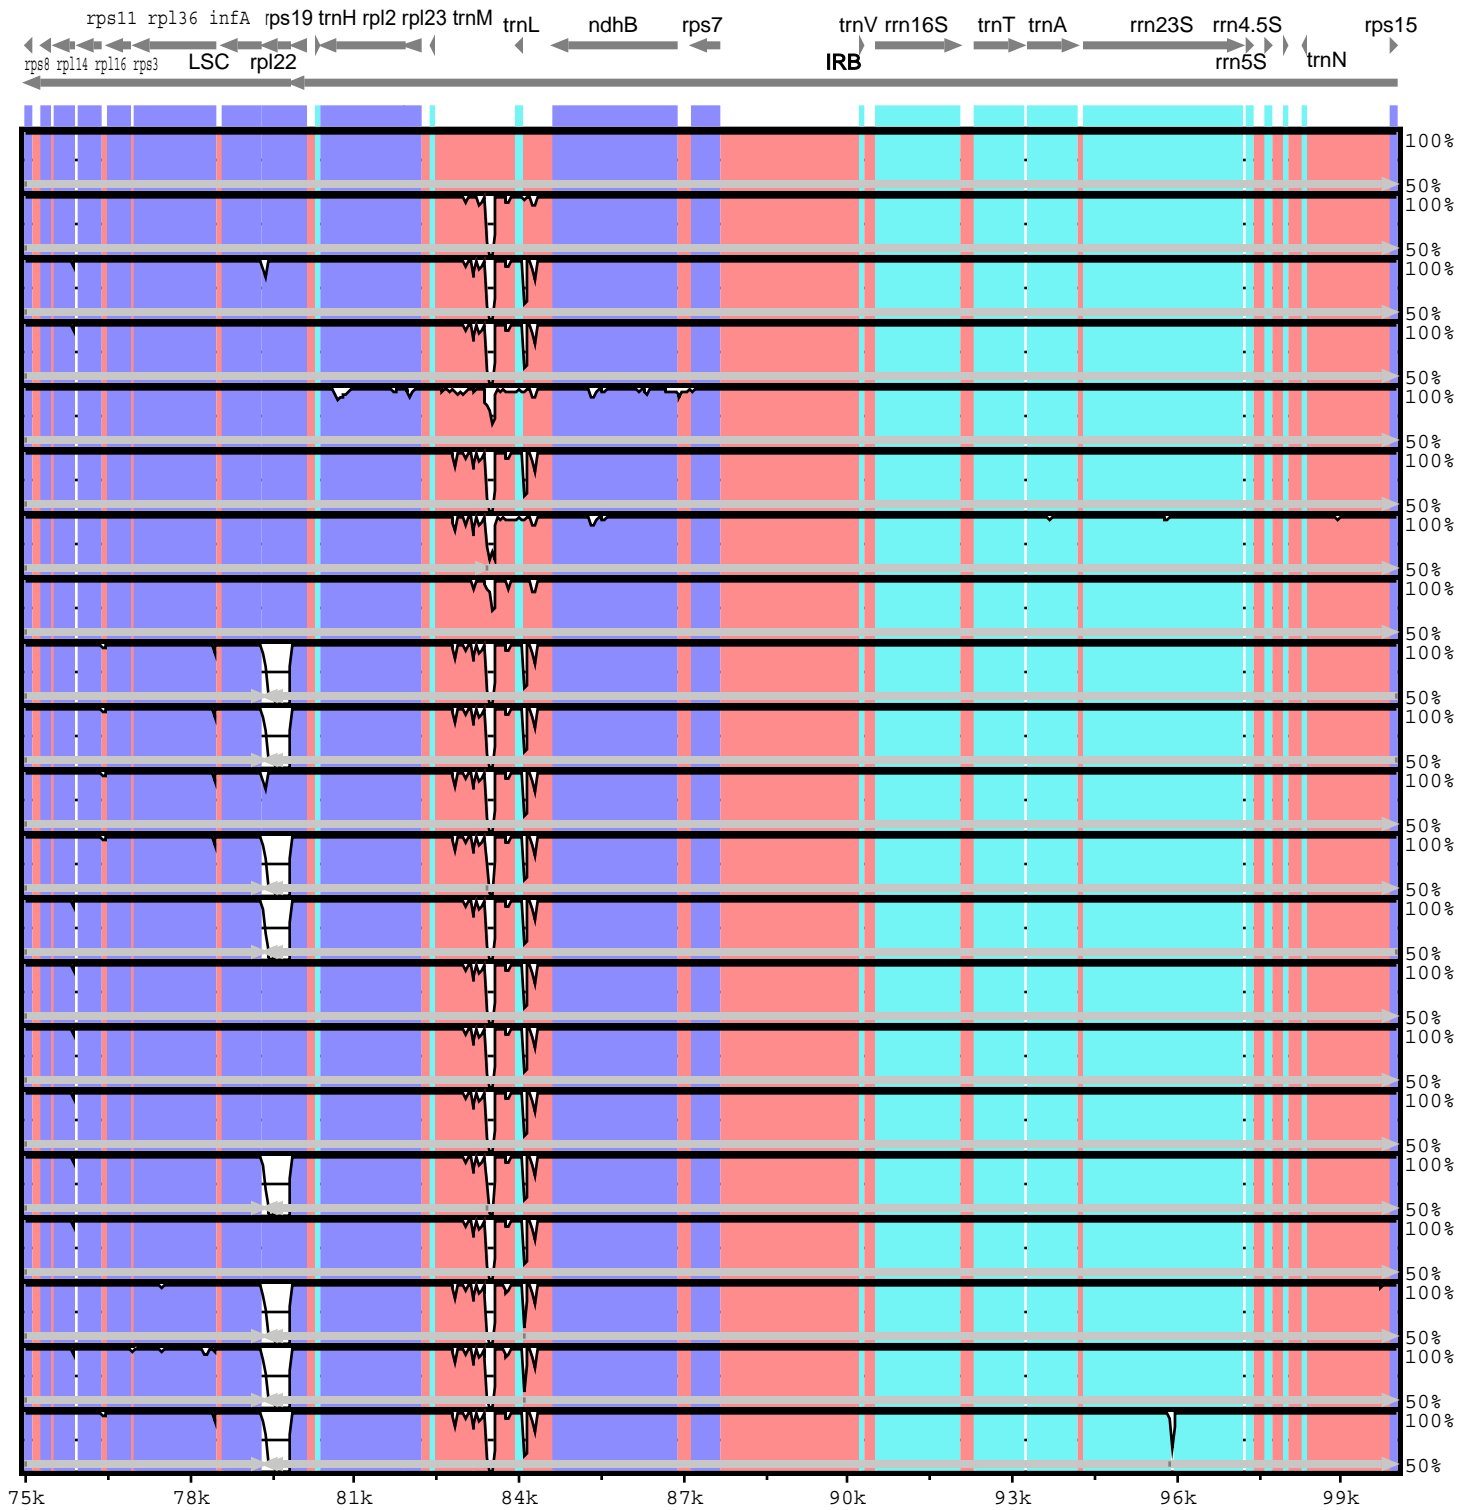

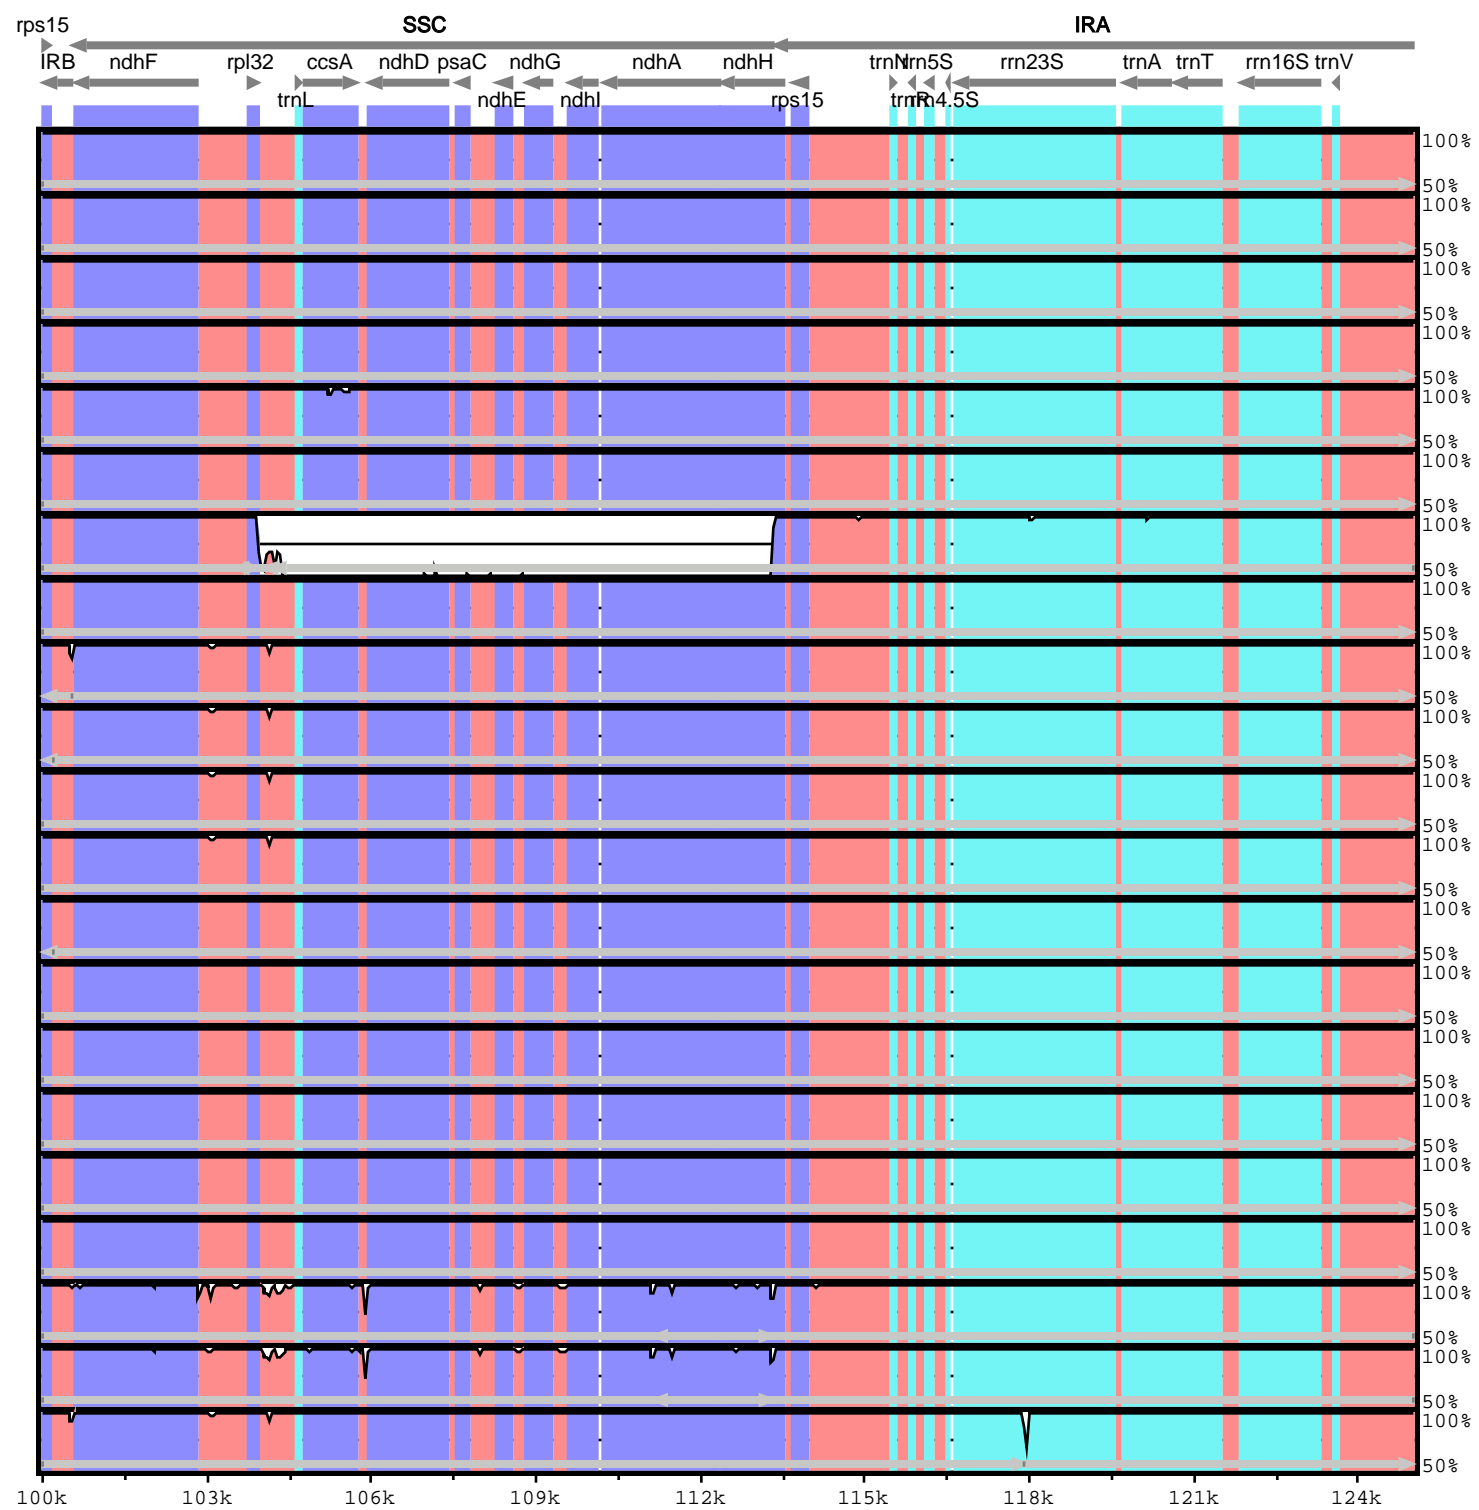

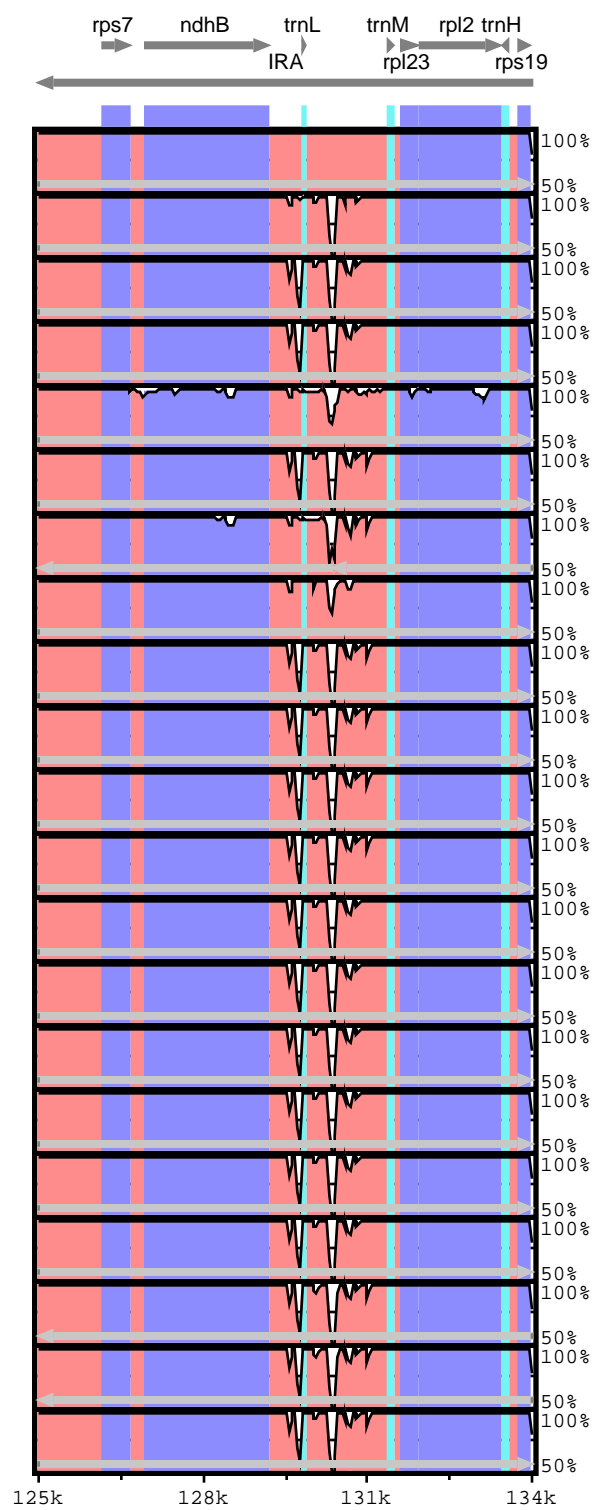

Supplement: s1 [file s1]
